# Supplementary material
Source: bioRxiv or medRxiv preprint supplement (https://medrxiv.org/highwire/filestream/92056/field_highwire_adjunct_files/0/2020.08.03.20167189-1.pdf)
Supplement: Supplementary file [file 2020.08.03.20167189-1.pdf]

| <b>Country</b>               | <b>Obs.<sup>1</sup></b> | <b>St. Dev.<sup>2</sup></b> | <b>Min.<sup>3</sup></b> | <b>Max.<sup>4</sup></b> |
|------------------------------|-------------------------|-----------------------------|-------------------------|-------------------------|
| Afghanistan                  | 98                      | 3910.04                     | 1                       | 15205                   |
| Albania                      | 85                      | 356.63                      | 2                       | 1137                    |
| Algeria                      | 97                      | 3004.40                     | 1                       | 9394                    |
| Andorra                      | 91                      | 305.07                      | 1                       | 764                     |
| Antigua and Barbuda          | 79                      | 9.07                        | 1                       | 25                      |
| Argentina                    | 90                      | 4323.10                     | 1                       | 16838                   |
| Armenia                      | 93                      | 2414.60                     | 1                       | 9282                    |
| Aruba                        | 81                      | 36.29                       | 2                       | 101                     |
| Australia                    | 129                     | 3193.37                     | 1                       | 7195                    |
| Austria                      | 97                      | 6538.91                     | 2                       | 16642                   |
| Azerbaijan                   | 94                      | 1501.95                     | 1                       | 5494                    |
| Bahamas                      | 78                      | 35.99                       | 1                       | 102                     |
| Bahrain                      | 99                      | 3189.06                     | 1                       | 11398                   |
| Bangladesh                   | 79                      | 13209.52                    | 3                       | 47153                   |
| Barbados                     | 76                      | 26.97                       | 1                       | 92                      |
| Belarus                      | 87                      | 13849.71                    | 1                       | 42556                   |
| Belgium                      | 119                     | 23426.91                    | 1                       | 58381                   |
| Bermuda                      | 74                      | 45.47                       | 2                       | 140                     |
| Bhutan                       | 88                      | 9.67                        | 1                       | 43                      |
| Bolivia                      | 81                      | 2567.56                     | 2                       | 9982                    |
| Bosnia and Herzegovina       | 88                      | 900.29                      | 2                       | 2509                    |
| Brazil                       | 97                      | 134512.70                   | 1                       | 514849                  |
| Brunei                       | 84                      | 35.78                       | 1                       | 141                     |
| Bulgaria                     | 86                      | 868.72                      | 2                       | 2513                    |
| Burkina Faso                 | 83                      | 292.54                      | 2                       | 881                     |
| Cambodia                     | 126                     | 57.13                       | 1                       | 125                     |
| Cameroon                     | 87                      | 1701.32                     | 1                       | 5904                    |
| Canada                       | 128                     | 31584.58                    | 1                       | 90936                   |
| Cape Verde                   | 73                      | 147.47                      | 2                       | 435                     |
| Cayman Islands               | 74                      | 40.19                       | 1                       | 141                     |
| Central African Republic     | 78                      | 251.52                      | 1                       | 1011                    |
| Chad                         | 74                      | 259.08                      | 1                       | 778                     |
| Chile                        | 90                      | 25818.95                    | 1                       | 99688                   |
| China                        | 154                     | 33927.74                    | 27                      | 84147                   |
| Colombia                     | 83                      | 7981.44                     | 1                       | 29383                   |
| Congo                        | 78                      | 185.87                      | 1                       | 611                     |
| Costa Rica                   | 87                      | 320.68                      | 1                       | 1056                    |
| Cote d'Ivoire                | 82                      | 889.69                      | 1                       | 2833                    |
| Croatia                      | 94                      | 899.99                      | 1                       | 2246                    |
| Cuba                         | 82                      | 762.93                      | 3                       | 2045                    |
| Curacao                      | 81                      | 4.98                        | 1                       | 19                      |
| Cyprus                       | 84                      | 346.64                      | 2                       | 944                     |
| Czech Republic               | 92                      | 3359.67                     | 3                       | 9273                    |
| Democratic Republic of Congo | 83                      | 846.72                      | 1                       | 3049                    |
| Denmark                      | 96                      | 4289.06                     | 1                       | 11669                   |
| Djibouti                     | 75                      | 882.05                      | 1                       | 3354                    |
| Dominican Republic           | 92                      | 5424.50                     | 1                       | 17285                   |
| Ecuador                      | 93                      | 14540.42                    | 1                       | 39098                   |
| Egypt                        | 108                     | 6266.30                     | 1                       | 24985                   |

<sup>1</sup> Number of observations.

<sup>2</sup> Standard deviation.

<sup>3</sup> Minimum value.

<sup>4</sup> Maximum value.

|                   |     |          |    |        |
|-------------------|-----|----------|----|--------|
| El Salvador       | 75  | 734.83   | 1  | 2517   |
| Equatorial Guinea | 79  | 378.06   | 1  | 1306   |
| Estonia           | 90  | 675.19   | 1  | 1869   |
| Ethiopia          | 80  | 251.82   | 1  | 1172   |
| Faeroe Islands    | 74  | 25.67    | 72 | 187    |
| Finland           | 120 | 2573.84  | 1  | 6859   |
| France            | 129 | 61210.50 | 3  | 151753 |
| French Polynesia  | 75  | 14.63    | 3  | 60     |
| Gabon             | 81  | 780.49   | 1  | 2655   |
| Gambia            | 76  | 8.66     | 1  | 25     |
| Georgia           | 96  | 278.60   | 1  | 783    |
| Germany           | 126 | 75293.38 | 1  | 181815 |
| Ghana             | 81  | 2641.26  | 2  | 8070   |
| Gibraltar         | 74  | 43.79    | 10 | 169    |
| Greece            | 94  | 1068.22  | 1  | 2917   |
| Greenland         | 74  | 2.52     | 2  | 13     |
| Guam              | 75  | 46.89    | 3  | 175    |
| Guatemala         | 79  | 1330.01  | 1  | 5087   |
| Guernsey          | 74  | 86.60    | 1  | 252    |
| Guinea            | 80  | 1247.51  | 1  | 3771   |
| Guyana            | 81  | 48.04    | 1  | 153    |
| Haiti             | 74  | 467.62   | 2  | 2124   |
| Honduras          | 82  | 1478.03  | 2  | 5202   |
| Hungary           | 88  | 1436.35  | 2  | 3876   |
| Iceland           | 94  | 710.57   | 1  | 1806   |
| India             | 124 | 47758.70 | 1  | 190535 |
| Indonesia         | 92  | 7990.59  | 2  | 26473  |
| Iran              | 103 | 47949.98 | 2  | 151466 |
| Iraq              | 98  | 1618.07  | 1  | 6439   |
| Ireland           | 92  | 10007.37 | 1  | 24990  |
| Isle of Man       | 73  | 118.89   | 1  | 336    |
| Israel            | 98  | 7039.28  | 1  | 17071  |
| Italy             | 123 | 93907.73 | 3  | 233019 |
| Jamaica           | 82  | 222.87   | 2  | 586    |
| Japan             | 139 | 6760.13  | 1  | 16884  |
| Jersey            | 74  | 102.13   | 5  | 308    |
| Jordan            | 91  | 235.23   | 1  | 739    |
| Kazakhstan        | 79  | 3228.04  | 6  | 11308  |
| Kenya             | 80  | 487.71   | 1  | 1962   |
| Kosovo            | 78  | 384.68   | 2  | 1064   |
| Kuwait            | 99  | 7568.82  | 3  | 27043  |
| Kyrgyzstan        | 75  | 517.73   | 3  | 1817   |
| Latvia            | 87  | 364.09   | 1  | 1066   |
| Lebanon           | 101 | 371.49   | 1  | 1220   |
| Liberia           | 77  | 98.09    | 1  | 288    |
| Liechtenstein     | 89  | 29.50    | 1  | 83     |
| Lithuania         | 86  | 599.61   | 1  | 1675   |
| Luxembourg        | 93  | 1570.73  | 1  | 4018   |
| Macedonia         | 96  | 756.60   | 1  | 2226   |
| Madagascar        | 73  | 188.87   | 3  | 771    |
| Malaysia          | 128 | 2936.54  | 3  | 7819   |
| Maldives          | 86  | 535.80   | 2  | 1773   |
| Malta             | 87  | 205.20   | 1  | 616    |
| Mauritania        | 79  | 112.13   | 1  | 530    |
| Mauritius         | 74  | 105.08   | 3  | 335    |

|                                  |     |           |          |        |
|----------------------------------|-----|-----------|----------|--------|
| Mexico                           | 86  | 25974.91  | 2        | 90664  |
| Moldova                          | 86  | 2627.14   | 1        | 8251   |
| Monaco                           | 94  | 39.18     | 1        | 99     |
| Mongolia                         | 84  | 54.16     | 1        | 185    |
| Montenegro                       | 76  | 110.02    | 2        | 324    |
| Montserrat                       | 73  | 3.26      | 1        | 11     |
| Morocco                          | 84  | 2814.16   | 1        | 7807   |
| Myanmar                          | 76  | 79.21     | 0.285714 | 228    |
| Namibia                          | 79  | 5.67      | 2        | 24     |
| Nepal                            | 116 | 284.68    | 1        | 1572   |
| Netherlands                      | 95  | 17859.33  | 1        | 46442  |
| New Caledonia                    | 73  | 3.33      | 2        | 19     |
| New Zealand                      | 88  | 460.65    | 1        | 1154   |
| Nicaragua                        | 75  | 209.10    | 1        | 759    |
| Niger                            | 73  | 339.38    | 1        | 958    |
| Nigeria                          | 95  | 2944.82   | 1        | 10162  |
| Norway                           | 96  | 3149.08   | 1        | 8411   |
| Oman                             | 98  | 2790.72   | 2        | 11437  |
| Pakistan                         | 96  | 20519.79  | 2        | 72460  |
| Palestine                        | 88  | 220.75    | 7        | 627    |
| Panama                           | 84  | 4045.32   | 1        | 13463  |
| Paraguay                         | 82  | 325.16    | 1        | 986    |
| Peru                             | 86  | 46736.16  | 1        | 164476 |
| Philippines                      | 124 | 5297.86   | 1        | 18086  |
| Poland                           | 88  | 7785.27   | 1        | 23786  |
| Portugal                         | 91  | 11771.87  | 2        | 32500  |
| Qatar                            | 93  | 16262.17  | 1        | 56910  |
| Romania                          | 96  | 6949.00   | 1        | 19257  |
| Russia                           | 122 | 121470.40 | 2        | 405843 |
| Rwanda                           | 79  | 112.45    | 1        | 370    |
| Saint Lucia                      | 79  | 5.77      | 2        | 18     |
| Saint Vincent and the Grenadines | 81  | 7.33      | 1        | 26     |
| San Marino                       | 95  | 237.78    | 1        | 671    |
| Saudi Arabia                     | 91  | 26482.33  | 1        | 85261  |
| Senegal                          | 84  | 1133.16   | 1        | 3645   |
| Serbia                           | 84  | 4415.07   | 1        | 11412  |
| Seychelles                       | 79  | 2.11      | 2        | 11     |
| Singapore                        | 130 | 11395.07  | 3        | 34884  |
| Sint Maarten (Dutch part)        | 91  | 33.35     | 1        | 77     |
| Slovakia                         | 87  | 585.62    | 1        | 1522   |
| Slovenia                         | 89  | 522.53    | 1        | 1473   |
| Somalia                          | 77  | 658.25    | 1        | 1976   |
| South Africa                     | 86  | 8456.20   | 1        | 32683  |
| South Korea                      | 134 | 4647.21   | 1        | 11503  |
| Spain                            | 121 | 100017.70 | 1        | 239429 |
| Sri Lanka                        | 126 | 443.45    | 1        | 1633   |
| Sudan                            | 80  | 1438.34   | 1        | 5026   |
| Suriname                         | 79  | 3.25      | 1        | 23     |
| Swaziland                        | 79  | 96.27     | 1        | 285    |
| Sweden                           | 122 | 12371.60  | 1        | 37542  |
| Switzerland                      | 97  | 12328.60  | 1        | 30779  |
| Taiwan                           | 132 | 189.14    | 1        | 442    |
| Tanzania                         | 77  | 223.59    | 1        | 509    |
| Thailand                         | 141 | 1351.66   | 1        | 3081   |
| Togo                             | 87  | 131.76    | 1        | 442    |

|                     |     |            |    |         |
|---------------------|-----|------------|----|---------|
| Trinidad and Tobago | 81  | 36.44      | 1  | 117     |
| Tunisia             | 91  | 423.39     | 1  | 1077    |
| Turkey              | 82  | 61005.68   | 1  | 163942  |
| UAE                 | 127 | 10192.29   | 1  | 34557   |
| UK                  | 123 | 99306.05   | 2  | 274762  |
| USA                 | 133 | 611912.10  | 1  | 1790191 |
| Ukraine             | 90  | 7988.59    | 1  | 23672   |
| Uruguay             | 79  | 232.31     | 6  | 823     |
| Uzbekistan          | 78  | 1180.40    | 6  | 3662    |
| Vatican             | 87  | 4.18       | 1  | 12      |
| Venezuela           | 79  | 373.40     | 10 | 1510    |
| Vietnam             | 126 | 127.69     | 2  | 328     |
| World               | 154 | 1861141.00 | 27 | 6136085 |
| Zambia              | 75  | 359.55     | 2  | 1057    |
| Zimbabwe            | 73  | 37.54      | 1  | 178     |

**Table 1:** Descriptive statistics of cumulative COVID-19 cases.
